# Supplementary material
Source: MDPI journal article supplement (https://www.mdpi.com/1424-2818/13/8/386)
Supplement: s1 [file s1]

Supplemental Information for: Genetic Diversity and Population Structure of Two Endangered Neotropical Parrots Inform *In Situ* and *Ex Situ* Conservation Strategies, Campos et al, 2021 - Diversity

**Table S1:** Wild sampling information for the blue-throated macaw and thick-billed parrot. All ID's are as recorded in metadata provided by field crews. Samples in parentheses were randomly removed as assumed first-order relatives of another bird sampled from the same nest.

| Species                 | Sampling Locality (n)   | Sample ID's (Removed)                                                                                                                                                                                                                                                                                                                      |
|-------------------------|-------------------------|--------------------------------------------------------------------------------------------------------------------------------------------------------------------------------------------------------------------------------------------------------------------------------------------------------------------------------------------|
| <i>A. glaucogularis</i> | Bethel (11)             | 25, (26), 28, (29), (30), 49, (50), (51), (52)                                                                                                                                                                                                                                                                                             |
|                         | Cantina (3)             | 69, (70), (71)                                                                                                                                                                                                                                                                                                                             |
|                         | Esperancita (25)        | 1, (3), (4), (5), (6), (9), (11), (13), (15), 19, (20), (21), (37), (38), (39), 47, 48, 60, (61), (62), 63, 72, (73), 74, (75), 76, 77                                                                                                                                                                                                     |
|                         | Holanda (8)             | (22), (34), (35), 36, 43, (44), 46, (55)                                                                                                                                                                                                                                                                                                   |
|                         | La Verde (6)            | 16, (17), (18), (23), (24), 40                                                                                                                                                                                                                                                                                                             |
|                         | Palma Sola (5)          | 31, (32), (33), 41, (42)                                                                                                                                                                                                                                                                                                                   |
|                         | Urkupiña (2)            | 27, (45)                                                                                                                                                                                                                                                                                                                                   |
|                         | <b>Total = 60 Birds</b> |                                                                                                                                                                                                                                                                                                                                            |
| <i>R. pachyrhyncha</i>  | Madera (37)             | (001), 002, 003, (004), (200201), 200202, 230201, (230202), (230203), 291201, (291501), 291502, (291503), 2302-40, (2604-41), 2604-42, (2915-48), (2915-49), 2915-50, M0129-1, (M0129-2), M0229-1, (M0429-1) M0429-2, M1-2, (M12-1), (M12-2), M12-3, M1628-1, (M1628-2), (M2604-1), M2604-2, (M2604-3), (PN02-44), PN02-45, X5-46, (X5-47) |
|                         | San Juanito (1)         | SJ5801-2                                                                                                                                                                                                                                                                                                                                   |
|                         | Tutuaca (8)             | 3711-2, T0739-2, (T0839-1), T0839-2, T0939-1, (T0939-2), (T1339-1), T1339-2                                                                                                                                                                                                                                                                |
|                         | <b>Total = 46 birds</b> |                                                                                                                                                                                                                                                                                                                                            |

Supplemental Information for: Genetic Diversity and Population Structure of Two Endangered Neotropical Parrots Inform *In Situ* and *Ex Situ* Conservation Strategies, Campos et al, 2021 - Diversity

**Table S2:** Captive sampling information for the blue-throated macaw and thick-billed parrot. Sample ID's are studbook numbers. ID's marked with asterisk are local ID's for samples where no Studbook ID is available.

| Species                 | Country                 | Organization                            | Sample ID's                                                                                                         |
|-------------------------|-------------------------|-----------------------------------------|---------------------------------------------------------------------------------------------------------------------|
| <i>A. glaucogularis</i> | United States           | Dallas World Aquarium                   | 966, 973, 1099, 1103, 1146                                                                                          |
|                         | United States           | Moody Gardens                           | 996, 997, 1013                                                                                                      |
|                         | United States           | Natural Encounters Zoo                  | 17, 38, 63, 72, 82, 109, 199, 216, 218, 219, 296, 297, 457, 805, 821, 877, 933, 940, 956, 958, 959, 961, 1079, 1085 |
|                         | United States           | Pinola Conservancy                      | 1068, No_Band*, WPP_TX_1606_1.0*, 818, 983                                                                          |
|                         | United States           | St. Augustine Alligator Farm            | 53*, 54*, 56*, 57*, 58*, 59*                                                                                        |
|                         | Bolivia                 | Blue-throated Macaw Conservation Center | 64*, 65*, 66*, 67*, 68*                                                                                             |
|                         | Bolivia                 | Santa Cruz Zoo                          | 806, 761, 765, 772, 779, 786, 794, 809, 812, 871, 1017, 1030                                                        |
|                         | Canada                  | African Lion Safari                     |                                                                                                                     |
|                         | <b>Total = 60 Birds</b> |                                         |                                                                                                                     |
|                         | United States           | Akron Zoo                               | 37, 148, 149, 151, 221, 287, 343, 386, 504, 527, 528, 544, 545                                                      |
| <i>R. pachyrhyncha</i>  | United States           | Albuquerque Zoo                         | 450, 502                                                                                                            |
|                         | United States           | Ft. Worth Zoo                           | 106, 274                                                                                                            |
|                         | United States           | Living Desert                           | 75, 435, 503, 646                                                                                                   |
|                         | United States           | Phoenix Zoo                             | 227, 556, 571, 572, 587                                                                                             |
|                         | United States           | Riverbanks Zoo                          | 322, 659, 6614*                                                                                                     |
|                         | United States           | Sacramento Zoo                          | 58, 82, 90, 111, 216, 228, 397, 468, 575, 581, 592, 594, 595, 603, 604, 606, 651, 652, 201650*, 201651*             |
|                         | United States           | San Diego Zoo                           | 589                                                                                                                 |
|                         | United States           | San Diego Wild Animal Park              | 200, 421, 513, 808105*, 808146*                                                                                     |
|                         | United States           | Sedgewick Zoo                           | 574, 582, 601, 634, 640, 641, 11029*, 12137*, 12138*                                                                |
|                         | United States           | Tulsa Zoo                               | 240, 241, 15463*, 15464*                                                                                            |
| <b>Total = 68 Birds</b> |                         |                                         | 68                                                                                                                  |

**Table S3:** Previously unpublished primer sequences developed for the thick-billed parrot

| Primer                   | Sequence (5'-3')                                           | Repeat Motif                           | T <sub>a</sub> (°C) |
|--------------------------|------------------------------------------------------------|----------------------------------------|---------------------|
| Rhpac074 <sup>[30]</sup> | For: TGAACCTTCTGTGTCAAGAGGA<br>Rev: CTTTTCTGGGTGCTGATGT    | (CA) <sub>10</sub>                     | 53                  |
| Rhpac149 <sup>[30]</sup> | For: TCTTCTCCATGCACATCAGTG<br>Rev: GCTTCCTGGTATGACCCTTG    | (GT) <sub>9</sub> GA(GT) <sub>10</sub> | 56                  |
| TBP2-39 <sup>[29]</sup>  | For: TCATTGCTATATTCGGGTTTCCT<br>Rev: TGCTCTGTCCTGTCTTGATAA | (GA) <sub>10</sub>                     | 55                  |
| TBP2-61 <sup>[29]</sup>  | For: CAAACAAGCATCCAGAAGACAA<br>Rev: TATTGCAACATCTTGCCTGACT | (GT) <sub>14</sub>                     | 58                  |

**Table S4:** Primer success rate in PCR for blue-throated macaw and thick-billed parrot

| Species                 | Primer   | Number of<br>Individuals | Number<br>Successfully<br>Amplified | Success Rate<br>(%) |
|-------------------------|----------|--------------------------|-------------------------------------|---------------------|
| <i>A. glaucogularis</i> | SCMA09   | 116                      | 110                                 | 95                  |
|                         | SCMA46   | 116                      | 101                                 | 87                  |
|                         | SCMA19   | 116                      | 95                                  | 82                  |
|                         | SCMA31   | 116                      | 95                                  | 82                  |
|                         | SCMA14   | 116                      | 111                                 | 96                  |
|                         | SCMA27   | 116                      | 112                                 | 97                  |
|                         | SCMA12   | 116                      | 85                                  | 73                  |
|                         | SCMA11   | 116                      | 110                                 | 95                  |
|                         | SCMA22   | 116                      | 112                                 | 97                  |
|                         | SCMA26   | 116                      | 113                                 | 97                  |
|                         | SCMA34   | 116                      | 81                                  | 70                  |
|                         | SCMA02   | 116                      | 107                                 | 92                  |
| <i>R. pachyrhyncha</i>  | UnaCT74  | 113                      | 108                                 | 96                  |
|                         | UnaCT21  | 113                      | 111                                 | 98                  |
|                         | UnaCT55  | 113                      | 112                                 | 99                  |
|                         | UnaCT43  | 113                      | 105                                 | 93                  |
|                         | TBP2-39  | 113                      | 108                                 | 96                  |
|                         | TBP2-61  | 113                      | 111                                 | 98                  |
|                         | Rhpac149 | 113                      | 110                                 | 97                  |
|                         | Rhpac074 | 113                      | 106                                 | 94                  |
|                         | MmGT057  | 113                      | 109                                 | 96                  |
|                         | MmGT090  | 113                      | 109                                 | 96                  |
|                         | CyanP05  | 113                      | 107                                 | 95                  |

Supplemental Information for: Genetic Diversity and Population Structure of Two Endangered Neotropical Parrots Inform *In Situ* and *Ex Situ* Conservation Strategies, Campos et al, 2021 - Diversity

**Table S5:** Relatedness matrix of blue-throated macaw individuals remaining after dataset reduction using captive pedigree and wild sampling data. Sample ID's in red are individuals randomly removed from dataset due as result of relatedness. Green cells= Confirmed unrelated; Yellow=Related but not 1st order; Red=Cannot confirm.

| a. Captive Population    |                 |           |           |           |           |           |           |           |           |           |           |                 |      |         |      |      |      |      |      |      |      |      |      |      |      |              |                   |           |           |           |           |
|--------------------------|-----------------|-----------|-----------|-----------|-----------|-----------|-----------|-----------|-----------|-----------|-----------|-----------------|------|---------|------|------|------|------|------|------|------|------|------|------|------|--------------|-------------------|-----------|-----------|-----------|-----------|
| Sample ID                | 821             | 457       | 296       | 109       | 38        | 805       | 17        | 38        | 961       | 1079      | 973       | WPP_TX_1606_1.0 | 1068 | No_Band | 1013 | 996  | 983  | 806  | 772  | 812  | 786  | 765  | 871  | 779  | 809  | SC_Muestra53 | BolCapt_Muestra64 | Muestra65 | Muestra66 | Muestra67 | Muestra68 |
| 821                      | 1               |           |           |           |           |           |           |           |           |           |           |                 |      |         |      |      |      |      |      |      |      |      |      |      |      |              |                   |           |           |           |           |
| 457                      | 0               | 1         |           |           |           |           |           |           |           |           |           |                 |      |         |      |      |      |      |      |      |      |      |      |      |      |              |                   |           |           |           |           |
| 296                      | 0.09            | 0         | 1         |           |           |           |           |           |           |           |           |                 |      |         |      |      |      |      |      |      |      |      |      |      |      |              |                   |           |           |           |           |
| 109                      | 0               | 0         | 0         | 1         |           |           |           |           |           |           |           |                 |      |         |      |      |      |      |      |      |      |      |      |      |      |              |                   |           |           |           |           |
| 38                       | 0               | 0         | 0         | 0         | 1         |           |           |           |           |           |           |                 |      |         |      |      |      |      |      |      |      |      |      |      |      |              |                   |           |           |           |           |
| 805                      | 0.07            | 0         | 0         | 0.13      | 0         | 1         |           |           |           |           |           |                 |      |         |      |      |      |      |      |      |      |      |      |      |      |              |                   |           |           |           |           |
| 17                       | 0               | 0         | 0         | 0.25      | 0         | 0         | 1         |           |           |           |           |                 |      |         |      |      |      |      |      |      |      |      |      |      |      |              |                   |           |           |           |           |
| 38                       | 0.16            | 0.14      | 0         | 0.12      | 0         | 0.31      | 0         | 1         |           |           |           |                 |      |         |      |      |      |      |      |      |      |      |      |      |      |              |                   |           |           |           |           |
| 961                      | 0.05            | 0.07      | 0         | 0.12      | 0.09      | 0         | 0         | 0.09      | 1         |           |           |                 |      |         |      |      |      |      |      |      |      |      |      |      |      |              |                   |           |           |           |           |
| 1079                     | 0.13            | 0         | 0         | 0.01      | 0         | 0.12      | 0         | 0         | 0         | 1         |           |                 |      |         |      |      |      |      |      |      |      |      |      |      |      |              |                   |           |           |           |           |
| 973                      | 0.5             | 0         | 0         | 0         | 0.07      | 0.32      | 0         | 0.37      | 0.05      | 0.01      | 1         |                 |      |         |      |      |      |      |      |      |      |      |      |      |      |              |                   |           |           |           |           |
| WPP_TX_1606_1.0          | 0.12            | 0         | 0         | 0.12      | 0         | 0         | 0.2       | 0         | 0.32      | 0.07      | 0         | 1               |      |         |      |      |      |      |      |      |      |      |      |      |      |              |                   |           |           |           |           |
| 1068                     | 0.41            | 0.5       | 0         | 0         | 0.15      | 0         | 0         | 0         | 0         | 0.07      | 0         | 0               | 1    |         |      |      |      |      |      |      |      |      |      |      |      |              |                   |           |           |           |           |
| No_Band                  | 0.26            | 0.26      | 0         | 0.35      | 0         | 0         | 0         | 0.14      | 0         | 0.02      | 0         | 0               | 0.66 | 1       |      |      |      |      |      |      |      |      |      |      |      |              |                   |           |           |           |           |
| 1013                     | 0               | 0         | 0.11      | 0.07      | 0         | 0         | 0.05      | 0         | 0.28      | 0.12      | 0.19      | 0               | 0    | 0       | 1    |      |      |      |      |      |      |      |      |      |      |              |                   |           |           |           |           |
| 996                      | 0.03            | 0         | 0         | 0         | 0         | 0         | 0         | 0         | 0         | 0.09      | 0         | 0               | 0    | 0.34    | 0    | 1    |      |      |      |      |      |      |      |      |      |              |                   |           |           |           |           |
| 983                      | 0               | 0         | 0         | 0         | 0         | 0.14      | 0.01      | 0.16      | 0.11      | 0         | 0         | 0.03            | 0.16 | 0.04    | 0.5  | 0.13 | 1    |      |      |      |      |      |      |      |      |              |                   |           |           |           |           |
| 806                      | 0               | 0.28      | 0         | 0         | 0.18      | 0.13      | 0         | 0.26      | 0.16      | 0.17      | 0         | 0               | 0    | 0       | 0    | 0    | 0    | 1    |      |      |      |      |      |      |      |              |                   |           |           |           |           |
| 772                      | 0               | 0         | 0         | 0.14      | 0         | 0.13      | 0.12      | 0.11      | 0         | 0.04      | 0         | 0               | 0.01 | 0       | 0.2  | 0.05 | 0    | 0    | 1    |      |      |      |      |      |      |              |                   |           |           |           |           |
| 812                      | 0.01            | 0         | 0.05      | 0         | 0         | 0         | 0         | 0         | 0.02      | 0.23      | 0         | 0.18            | 0    | 0       | 0    | 0.12 | 0.04 | 0    | 0    | 1    |      |      |      |      |      |              |                   |           |           |           |           |
| 786                      | 0.02            | 0         | 0         | 0.11      | 0.25      | 0         | 0         | 0         | 0.04      | 0         | 0.06      | 0               | 0    | 0       | 0    | 0    | 0.2  | 0    | 0.3  | 1    |      |      |      |      |      |              |                   |           |           |           |           |
| 765                      | 0               | 0         | 0.01      | 0         | 0.04      | 0.32      | 0         | 0.31      | 0         | 0         | 0.29      | 0               | 0    | 0.13    | 0    | 0.06 | 0    | 0.11 | 0    | 0.09 | 0.14 | 1    |      |      |      |              |                   |           |           |           |           |
| 871                      | 0               | 0         | 0         | 0         | 0         | 0.01      | 0         | 0.02      | 0         | 0.01      | 0.14      | 0               | 0    | 0       | 0    | 0.12 | 0    | 0    | 0    | 0    | 0    | 0.5  | 1    |      |      |              |                   |           |           |           |           |
| 779                      | 0               | 0         | 0.08      | 0.11      | 0         | 0.12      | 0         | 0         | 0.04      | 0         | 0         | 0               | 0    | 0       | 0.08 | 0    | 0    | 0    | 0    | 0    | 0.03 | 0    | 0.06 | 1    |      |              |                   |           |           |           |           |
| 809                      | 0               | 0         | 0         | 0         | 0.18      | 0         | 0         | 0         | 0.02      | 0         | 0         | 0.02            | 0    | 0       | 0    | 0    | 0    | 0    | 0.13 | 0.27 | 0    | 0.16 | 0.11 | 1    |      |              |                   |           |           |           |           |
| SC_Muestra53             | 0               | 0.17      | 0         | 0         | 0.28      | 0         | 0         | 0         | 0.01      | 0         | 0.26      | 0               | 0    | 0       | 0.04 | 0    | 0    | 0.35 | 0    | 0.03 | 0.41 | 0.23 | 0.27 | 0    | 0    | 1            |                   |           |           |           |           |
| BolCapt_Muestra64        | 0.03            | 0         | 0.07      | 0.06      | 0.02      | 0.26      | 0.17      | 0         | 0         | 0         | 0         | 0.01            | 0    | 0.06    | 0    | 0    | 0.03 | 0    | 0.15 | 0    | 0    | 0    | 0.04 | 0.09 | 0    | 1            |                   |           |           |           |           |
| Muestra65                | 0               | 0.08      | 0         | 0         | 0         | 0         | 0         | 0         | 0         | 0         | 0.04      | 0               | 0.19 | 0       | 0    | 0.07 | 0    | 0    | 0.28 | 0.35 | 0.09 | 0.14 | 0.05 | 0.11 | 0.39 | 0            | 1                 |           |           |           |           |
| Muestra66                | 0               | 0.19      | 0         | 0         | 0.27      | 0         | 0.14      | 0         | 0         | 0         | 0         | 0               | 0    | 0       | 0    | 0.03 | 0    | 0.5  | 0    | 0    | 0.12 | 0    | 0    | 0    | 0.21 | 0.3          | 0.07              | 0.26      | 1         |           |           |
| Muestra67                | 0               | 0.34      | 0         | 0         | 0         | 0.11      | 0         | 0         | 0         | 0         | 0         | 0               | 0    | 0       | 0    | 0.08 | 0.06 | 0    | 0.18 | 0.16 | 0    | 0    | 0    | 0    | 0.13 | 0            | 0.04              | 0         | 0.05      | 1         |           |
| Muestra68                | 0               | 0.14      | 0         | 0.3       | 0.08      | 0         | 0         | 0         | 0         | 0         | 0         | 0               | 0.28 | 0.07    | 0    | 0    | 0    | 0    | 0.06 | 0.08 | 0.09 | 0    | 0    | 0.06 | 0.19 | 0            | 0                 | 0.5       | 0         | 0.23      | 1         |
| b. North Wild Population |                 |           |           |           |           |           |           |           |           |           |           |                 |      |         |      |      |      |      |      |      |      |      |      |      |      |              |                   |           |           |           |           |
| Sample ID                | Nwild_Muestra16 | Muestra28 | Muestra41 | Muestra49 | Muestra25 | Muestra31 | Muestra36 | Muestra40 | Muestra43 | Muestra46 | Muestra27 |                 |      |         |      |      |      |      |      |      |      |      |      |      |      |              |                   |           |           |           |           |
| Nwild_Muestra16          | 1               |           |           |           |           |           |           |           |           |           |           |                 |      |         |      |      |      |      |      |      |      |      |      |      |      |              |                   |           |           |           |           |
| Muestra28                | 0               | 1         |           |           |           |           |           |           |           |           |           |                 |      |         |      |      |      |      |      |      |      |      |      |      |      |              |                   |           |           |           |           |
| Muestra41                | 0.08            | 0         | 1         |           |           |           |           |           |           |           |           |                 |      |         |      |      |      |      |      |      |      |      |      |      |      |              |                   |           |           |           |           |
| Muestra49                | 0.18            | 0         | 0         | 1         |           |           |           |           |           |           |           |                 |      |         |      |      |      |      |      |      |      |      |      |      |      |              |                   |           |           |           |           |
| Muestra25                | 0               | 0.23      | 0         | 0         | 1         |           |           |           |           |           |           |                 |      |         |      |      |      |      |      |      |      |      |      |      |      |              |                   |           |           |           |           |
| Muestra31                | 0               | 0         | 0         | 0         | 0         | 1         |           |           |           |           |           |                 |      |         |      |      |      |      |      |      |      |      |      |      |      |              |                   |           |           |           |           |
| Muestra36                | 0               | 0         | 0.23      | 0         | 0         | 0         | 1         |           |           |           |           |                 |      |         |      |      |      |      |      |      |      |      |      |      |      |              |                   |           |           |           |           |
| Muestra40                | 0.48            | 0         | 0         | 0.06      | 0         | 0         | 0         | 1         |           |           |           |                 |      |         |      |      |      |      |      |      |      |      |      |      |      |              |                   |           |           |           |           |
| Muestra43                | 0               | 0         | 0         | 0         | 0         | 0         | 0.41      | 0         | 1         |           |           |                 |      |         |      |      |      |      |      |      |      |      |      |      |      |              |                   |           |           |           |           |
| Muestra46                | 0               | 0         | 0.01      | 0         | 0.05      | 0         | 0.29      | 0         | 0.13      | 1         |           |                 |      |         |      |      |      |      |      |      |      |      |      |      |      |              |                   |           |           |           |           |
| Muestra27                | 0               | 0         | 0         | 0         | 0.5       | 0         | 0         | 0.1       | 0         | 0         | 1         |                 |      |         |      |      |      |      |      |      |      |      |      |      |      |              |                   |           |           |           |           |
| c. South Wild Population |                 |           |           |           |           |           |           |           |           |           |           |                 |      |         |      |      |      |      |      |      |      |      |      |      |      |              |                   |           |           |           |           |
| Sample ID                | Swild_Muestra1  | Muestra60 | Muestra69 | Muestra72 | Muestra74 | Muestra76 | Muestra77 | Muestra19 | Muestra47 | Muestra48 | Muestra63 |                 |      |         |      |      |      |      |      |      |      |      |      |      |      |              |                   |           |           |           |           |
| Swild_Muestra1           | 1               |           |           |           |           |           |           |           |           |           |           |                 |      |         |      |      |      |      |      |      |      |      |      |      |      |              |                   |           |           |           |           |
| Muestra60                | 0               | 1         |           |           |           |           |           |           |           |           |           |                 |      |         |      |      |      |      |      |      |      |      |      |      |      |              |                   |           |           |           |           |
| Muestra69                | 0.27            | 0         | 1         |           |           |           |           |           |           |           |           |                 |      |         |      |      |      |      |      |      |      |      |      |      |      |              |                   |           |           |           |           |
| Muestra72                | 0               | 0         | 0         | 1         |           |           |           |           |           |           |           |                 |      |         |      |      |      |      |      |      |      |      |      |      |      |              |                   |           |           |           |           |
| Muestra74                | 0               | 0.31      | 0         | 0         | 1         |           |           |           |           |           |           |                 |      |         |      |      |      |      |      |      |      |      |      |      |      |              |                   |           |           |           |           |
| Muestra76                | 0               | 0         | 0.02      | 0         | 0         | 1         |           |           |           |           |           |                 |      |         |      |      |      |      |      |      |      |      |      |      |      |              |                   |           |           |           |           |
| Muestra77                | 0.24            | 0         | 0.15      | 0.01      | 0.04      | 0         | 1         |           |           |           |           |                 |      |         |      |      |      |      |      |      |      |      |      |      |      |              |                   |           |           |           |           |
| Muestra19                | 0               | 0.26      | 0         | 0         | 0         | 0.04      | 0         | 1         |           |           |           |                 |      |         |      |      |      |      |      |      |      |      |      |      |      |              |                   |           |           |           |           |
| Muestra47                | 0.2             | 0.41      | 0         | 0         | 0         | 0.15      | 0         | 0         | 1         |           |           |                 |      |         |      |      |      |      |      |      |      |      |      |      |      |              |                   |           |           |           |           |
| Muestra48                | 0.66            | 0.1       | 0.16      | 0.23      | 0         | 0.14      | 0         | 0         | 0.11      | 1         |           |                 |      |         |      |      |      |      |      |      |      |      |      |      |      |              |                   |           |           |           |           |
| Muestra63                | 0               | 0         | 0.09      | 0         | 0.02      | 0.42      | 0         | 0         | 0         | 0         | 1         |                 |      |         |      |      |      |      |      |      |      |      |      |      |      |              |                   |           |           |           |           |

Supplemental Information for: Genetic Diversity and Population Structure of Two Endangered Neotropical Parrots Inform *In Situ* and *Ex Situ* Conservation Strategies, Campos et al, 2021 - Diversity

**Table S6:** Relatedness matrix of thick-billed parrot individuals remaining after dataset reduction using captive pedigree and wild sampling data. Sample ID's in red are individuals randomly removed from dataset as result of relatedness. Green cells= Confirmed unrelated; Yellow=Related but not 1st order; Red=Cannot confirm.

| a. Captive Population |      |      |      |      |      |      |      |      |      |      |      |      |      |      |      |      |      |      |      |      |      |      |      |      |      |      |      |      |      |      |      |      |      |      |      |      |   |
|-----------------------|------|------|------|------|------|------|------|------|------|------|------|------|------|------|------|------|------|------|------|------|------|------|------|------|------|------|------|------|------|------|------|------|------|------|------|------|---|
| Sample ID             | 37   | 75   | 82   | 106  | 111  | 148  | 149  | 151  | 200  | 216  | 227  | 228  | 240  | 241  | 274  | 386  | 421  | 435  | 450  | 468  | 502  | 503  | 513  | 527  | 544  | 556  | 571  | 572  | 575  | 587  | 589  | 592  | 640  | 641  | 646  | 659  |   |
| 37                    | 1    |      |      |      |      |      |      |      |      |      |      |      |      |      |      |      |      |      |      |      |      |      |      |      |      |      |      |      |      |      |      |      |      |      |      |      |   |
| 75                    | 0    | 1    |      |      |      |      |      |      |      |      |      |      |      |      |      |      |      |      |      |      |      |      |      |      |      |      |      |      |      |      |      |      |      |      |      |      |   |
| 82                    | 0    | 0.39 | 1    |      |      |      |      |      |      |      |      |      |      |      |      |      |      |      |      |      |      |      |      |      |      |      |      |      |      |      |      |      |      |      |      |      |   |
| 106                   | 0    | 0    | 0    | 1    |      |      |      |      |      |      |      |      |      |      |      |      |      |      |      |      |      |      |      |      |      |      |      |      |      |      |      |      |      |      |      |      |   |
| 111                   | 0.5  | 0    | 0.09 | 0    | 1    |      |      |      |      |      |      |      |      |      |      |      |      |      |      |      |      |      |      |      |      |      |      |      |      |      |      |      |      |      |      |      |   |
| 148                   | 0    | 0.1  | 0    | 0.03 | 0.01 | 1    |      |      |      |      |      |      |      |      |      |      |      |      |      |      |      |      |      |      |      |      |      |      |      |      |      |      |      |      |      |      |   |
| 149                   | 0    | 0    | 0    | 0.33 | 0    | 0.03 | 1    |      |      |      |      |      |      |      |      |      |      |      |      |      |      |      |      |      |      |      |      |      |      |      |      |      |      |      |      |      |   |
| 151                   | 0    | 0    | 0    | 0.32 | 0.27 | 0    | 0.34 | 1    |      |      |      |      |      |      |      |      |      |      |      |      |      |      |      |      |      |      |      |      |      |      |      |      |      |      |      |      |   |
| 200                   | 0    | 0    | 0    | 0    | 0    | 0    | 0    | 0    | 1    |      |      |      |      |      |      |      |      |      |      |      |      |      |      |      |      |      |      |      |      |      |      |      |      |      |      |      |   |
| 216                   | 0    | 0    | 0    | 0    | 0.42 | 0    | 0.05 | 0    | 0    | 1    |      |      |      |      |      |      |      |      |      |      |      |      |      |      |      |      |      |      |      |      |      |      |      |      |      |      |   |
| 227                   | 0    | 0    | 0    | 0.04 | 0.05 | 0.38 | 0.04 | 0    | 0    | 0.28 | 1    |      |      |      |      |      |      |      |      |      |      |      |      |      |      |      |      |      |      |      |      |      |      |      |      |      |   |
| 228                   | 0.02 | 0    | 0.11 | 0.14 | 0.06 | 0.03 | 0.37 | 0    | 0    | 0.06 | 0    | 1    |      |      |      |      |      |      |      |      |      |      |      |      |      |      |      |      |      |      |      |      |      |      |      |      |   |
| 240                   | 0.1  | 0    | 0.14 | 0.34 | 0.09 | 0.01 | 0.23 | 0.23 | 0    | 0    | 0.11 | 0    | 1    |      |      |      |      |      |      |      |      |      |      |      |      |      |      |      |      |      |      |      |      |      |      |      |   |
| 241                   | 0    | 0    | 0.2  | 0    | 0.43 | 0    | 0.18 | 0.28 | 0    | 0.1  | 0.39 | 0    | 0.22 | 1    |      |      |      |      |      |      |      |      |      |      |      |      |      |      |      |      |      |      |      |      |      |      |   |
| 274                   | 0    | 0.01 | 0    | 0.11 | 0    | 0    | 0    | 0.15 | 0.21 | 0    | 0    | 0    | 0    | 0.05 | 1    |      |      |      |      |      |      |      |      |      |      |      |      |      |      |      |      |      |      |      |      |      |   |
| 386                   | 0    | 0.11 | 0.04 | 0    | 0    | 0    | 0    | 0    | 0.11 | 0    | 0    | 0.13 | 0    | 0    | 0.5  | 1    |      |      |      |      |      |      |      |      |      |      |      |      |      |      |      |      |      |      |      |      |   |
| 421                   | 0.2  | 0    | 0    | 0    | 0    | 0    | 0    | 0    | 0    | 0    | 0.08 | 0    | 0    | 0.5  | 0    | 0    | 1    |      |      |      |      |      |      |      |      |      |      |      |      |      |      |      |      |      |      |      |   |
| 435                   | 0.33 | 0    | 0.1  | 0.08 | 0.5  | 0.06 | 0.07 | 0.12 | 0    | 0.03 | 0.08 | 0.11 | 0    | 0.03 | 0    | 0    | 0.15 | 1    |      |      |      |      |      |      |      |      |      |      |      |      |      |      |      |      |      |      |   |
| 450                   | 0.18 | 0.52 | 0.14 | 0    | 0    | 0    | 0    | 0    | 0    | 0.17 | 0    | 0.15 | 0.26 | 0    | 0.18 | 0.11 | 0    | 0    | 1    |      |      |      |      |      |      |      |      |      |      |      |      |      |      |      |      |      |   |
| 468                   | 0    | 0.07 | 0.12 | 0.1  | 0.5  | 0.22 | 0    | 0    | 0.12 | 0.27 | 0    | 0    | 0    | 0    | 0.17 | 0.15 | 0    | 0    | 0    | 1    |      |      |      |      |      |      |      |      |      |      |      |      |      |      |      |      |   |
| 502                   | 0    | 0.19 | 0    | 0.06 | 0    | 0.18 | 0    | 0.5  | 0    | 0    | 0    | 0    | 0    | 0    | 0.01 | 0.16 | 0    | 0.14 | 0.06 | 0    | 1    |      |      |      |      |      |      |      |      |      |      |      |      |      |      |      |   |
| 503                   | 0.17 | 0.47 | 0.18 | 0    | 0.12 | 0    | 0    | 0    | 0.21 | 0    | 0    | 0.24 | 0    | 0    | 0    | 0    | 0    | 0.02 | 0.07 | 0    | 0.11 | 1    |      |      |      |      |      |      |      |      |      |      |      |      |      |      |   |
| 513                   | 0    | 0    | 0.13 | 0    | 0    | 0    | 0.37 | 0.34 | 0.02 | 0    | 0    | 0    | 0    | 0.11 | 0    | 0    | 0    | 0.05 | 0    | 0.11 | 0    | 0    | 1    |      |      |      |      |      |      |      |      |      |      |      |      |      |   |
| 527                   | 0.14 | 0.21 | 0    | 0.1  | 0    | 0    | 0.25 | 0.18 | 0.23 | 0    | 0    | 0    | 0    | 0.14 | 0.1  | 0    | 0    | 0    | 0.21 | 0    | 0    | 0.2  | 0.25 | 1    |      |      |      |      |      |      |      |      |      |      |      |      |   |
| 544                   | 0    | 0.04 | 0    | 0    | 0    | 0.53 | 0    | 0    | 0.15 | 0    | 0.18 | 0    | 0    | 0    | 0    | 0    | 0    | 0    | 0    | 0    | 0.15 | 0    | 0.06 | 0    | 1    |      |      |      |      |      |      |      |      |      |      |      |   |
| 556                   | 0    | 0.1  | 0    | 0    | 0.05 | 0    | 0.17 | 0.5  | 0.04 | 0    | 0    | 0    | 0.23 | 0.12 | 0    | 0    | 0    | 0    | 0.07 | 0    | 0.08 | 0    | 0.04 | 0.23 | 0    | 1    |      |      |      |      |      |      |      |      |      |      |   |
| 571                   | 0    | 0    | 0.07 | 0.12 | 0.45 | 0    | 0    | 0    | 0    | 0.15 | 0.11 | 0    | 0.2  | 0.5  | 0    | 0    | 0    | 0.03 | 0    | 0.13 | 0    | 0    | 0    | 0.2  | 0    | 0    | 0    | 1    |      |      |      |      |      |      |      |      |   |
| 572                   | 0.02 | 0.18 | 0.14 | 0    | 0    | 0    | 0    | 0    | 0    | 0    | 0    | 0    | 0    | 0    | 0    | 0.1  | 0.23 | 0.08 | 0    | 0.5  | 0    | 0    | 0.37 | 0    | 0    | 0    | 0.17 | 1    |      |      |      |      |      |      |      |      |   |
| 575                   | 0    | 0    | 0    | 0.04 | 0    | 0.11 | 0.28 | 0.08 | 0    | 0    | 0    | 0.33 | 0.05 | 0    | 0.07 | 0    | 0    | 0    | 0.19 | 0    | 0.05 | 0    | 0.07 | 0.07 | 0    | 0.18 | 0    | 0    | 1    |      |      |      |      |      |      |      |   |
| 587                   | 0.04 | 0    | 0.14 | 0    | 0    | 0    | 0    | 0    | 0.15 | 0    | 0.2  | 0    | 0.03 | 0.43 | 0    | 0.5  | 0    | 0    | 0.03 | 0.18 | 0    | 0.04 | 0    | 0.18 | 0    | 0    | 0.71 | 0.13 | 0    | 1    |      |      |      |      |      |      |   |
| 589                   | 0    | 0.14 | 0.11 | 0    | 0    | 0    | 0.25 | 0    | 0.02 | 0    | 0    | 0.27 | 0    | 0    | 0.26 | 0.05 | 0.12 | 0    | 0    | 0    | 0.08 | 0.29 | 0    | 0.25 | 0.06 | 0    | 0    | 0    | 0.56 | 0    | 1    |      |      |      |      |      |   |
| 592                   | 0.5  | 0    | 0.09 | 0.1  | 0.11 | 0    | 0    | 0    | 0    | 0.16 | 0    | 0    | 0    | 0    | 0.22 | 0    | 0    | 0.26 | 0    | 0.5  | 0    | 0    | 0.11 | 0    | 0    | 0    | 0    | 0.06 | 0.04 | 0.15 | 0    | 1    |      |      |      |      |   |
| 640                   | 0    | 0    | 0.5  | 0    | 0    | 0    | 0.06 | 0    | 0    | 0.18 | 0    | 0.06 | 0    | 0    | 0    | 0    | 0    | 0    | 0.2  | 0    | 0    | 0.11 | 0.06 | 0    | 0.06 | 0.01 | 0    | 0.12 | 0.26 | 0    | 0.23 | 0.06 | 1    |      |      |      |   |
| 641                   | 0.19 | 0    | 0    | 0.09 | 0.31 | 0    | 0.5  | 0.43 | 0.11 | 0.18 | 0    | 0    | 0.24 | 0.48 | 0    | 0.3  | 0    | 0    | 0.36 | 0.19 | 0    | 0    | 0    | 0.11 | 0.02 | 0.22 | 0.18 | 0    | 0.28 | 0.2  | 0.04 | 0    | 0.25 | 1    |      |      |   |
| 646                   | 0    | 0.31 | 0    | 0    | 0    | 0.26 | 0    | 0    | 0.46 | 0    | 0    | 0    | 0    | 0    | 0.24 | 0.14 | 0    | 0    | 0    | 0.57 | 0.04 | 0    | 0.14 | 0    | 0.14 | 0.05 | 0    | 0.45 | 0    | 0.1  | 0    | 0.15 | 0    | 0.11 | 1    |      |   |
| 659                   | 0    | 0    | 0.13 | 0    | 0.1  | 0    | 0.04 | 0    | 0    | 0.56 | 0.21 | 0.47 | 0    | 0    | 0    | 0    | 0    | 0    | 0.1  | 0    | 0    | 0.01 | 0    | 0.01 | 0    | 0.01 | 0.27 | 0.03 | 0.28 | 0    | 0.13 | 0.14 | 0.18 | 0    | 0.45 | 0.13 | 0 |

Supplemental Information for: Genetic Diversity and Population Structure of Two Endangered Neotropical Parrots Inform *In Situ* and *Ex Situ* Conservation Strategies, Campos et al, 2021 - Diversity

| b. Madera Population  |             |             |             |             |            |            |            |           |             |             |             |             |           |             |             |          |             |             |
|-----------------------|-------------|-------------|-------------|-------------|------------|------------|------------|-----------|-------------|-------------|-------------|-------------|-----------|-------------|-------------|----------|-------------|-------------|
| SampleID              | 292201_Mad  | 1376_Mad    | 003_Mad     | 230201_Mad  | 200202_Mad | 291502_Mad | M0129-1Mad | X5-46_Mad | 2302-40_Mad | PN02-45_Mad | 2915-50_Mad | 2604-42_Mad | M12-3_Mad | M2604-2_Mad | M0229-1_Mad | M1-2_Mad | M0429-2_Mad | M1628-1_Mad |
| 292201_Mad            | 1           |             |             |             |            |            |            |           |             |             |             |             |           |             |             |          |             |             |
| 1376_Mad              | 0           | 1           |             |             |            |            |            |           |             |             |             |             |           |             |             |          |             |             |
| 003_Mad               | 0.05        | 0           | 1           |             |            |            |            |           |             |             |             |             |           |             |             |          |             |             |
| 230201_Mad            | 0           | 0           | 0           | 1           |            |            |            |           |             |             |             |             |           |             |             |          |             |             |
| 200202_Mad            | 0           | 0           | 0.5         | 0           | 1          |            |            |           |             |             |             |             |           |             |             |          |             |             |
| 291502_Mad            | 0           | 0           | 0           | 0.02        | 0.27       | 1          |            |           |             |             |             |             |           |             |             |          |             |             |
| M0129-1Mad            | 0.35        | 0           | 0           | 0.04        | 0          | 0          | 1          |           |             |             |             |             |           |             |             |          |             |             |
| X5-46_Mad             | 0.1         | 0           | 0           | 0           | 0.31       | 0          | 0          | 1         |             |             |             |             |           |             |             |          |             |             |
| 2302-40_Mad           | 0.28        | 0           | 0.26        | 0.38        | 0.5        | 0          | 0          | 0         | 1           |             |             |             |           |             |             |          |             |             |
| PN02-45_Mad           | 0           | 0.45        | 0           | 0.5         | 0          | 0          | 0          | 0         | 0.16        | 1           |             |             |           |             |             |          |             |             |
| 2915-50_Mad           | 0           | 0           | 0           | 0.19        | 0.27       | 0.71       | 0          | 0         | 0           | 0           | 1           |             |           |             |             |          |             |             |
| 2604-42_Mad           | 0.01        | 0           | 0           | 0           | 0          | 0          | 0.19       | 0.1       | 0           | 0           | 0           | 1           |           |             |             |          |             |             |
| M12-3_Mad             | 0.27        | 0           | 0           | 0           | 0          | 0          | 0          | 0.5       | 0.11        | 0           | 0           | 0           | 1         |             |             |          |             |             |
| M2604-2_Mad           | 0.11        | 0           | 0           | 0           | 0          | 0          | 0.19       | 0.28      | 0           | 0.05        | 0           | 0.8         | 0.06      | 1           |             |          |             |             |
| M0229-1_Mad           | 0           | 0.05        | 0           | 0.35        | 0.27       | 0.56       | 0          | 0         | 0           | 0           | 0.8         | 0           | 0         | 0           | 1           |          |             |             |
| M1-2_Mad              | 0           | 0.5         | 0.1         | 0           | 0          | 0          | 0.5        | 0         | 0           | 0.5         | 0           | 0           | 0         | 0           | 0           | 1        |             |             |
| M0429-2_Mad           | 0.5         | 0           | 0.01        | 0           | 0.5        | 0.02       | 0          | 0         | 0           | 0           | 0.02        | 0.11        | 0.27      | 0           | 0           | 0        | 1           |             |
| M1628-1_Mad           | 0.26        | 0           | 0           | 0           | 0          | 0.13       | 0          | 0.07      | 0.06        | 0.23        | 0           | 0           | 0.07      | 0           | 0           | 0.15     | 0           | 1           |
| c. Tutuaca Population |             |             |             |             |            |            |            |           |             |             |             |             |           |             |             |          |             |             |
| SampleID              | T0739-2_Tut | T0839-2_Tut | T0939-1_Tut | T1339-2_Tut | 3711-2_Tut |            |            |           |             |             |             |             |           |             |             |          |             |             |
| T0739-2_Tut           | 1           |             |             |             |            |            |            |           |             |             |             |             |           |             |             |          |             |             |
| T0839-2_Tut           | 0           | 1           |             |             |            |            |            |           |             |             |             |             |           |             |             |          |             |             |
| T0939-1_Tut           | 0           | 0           | 1           |             |            |            |            |           |             |             |             |             |           |             |             |          |             |             |
| T1339-2_Tut           | 0           | 0.02        | 0           | 1           |            |            |            |           |             |             |             |             |           |             |             |          |             |             |
| 3711-2_Tut            | 0.01        | 0           | 0           | 0           | 1          |            |            |           |             |             |             |             |           |             |             |          |             |             |

**Table S7: Proportions of self-assignment of wild and captive individuals to the wild populations**

**\*Treating Last Population as Unknown**

**Data Sheet** BTM\_Partition  
**Data Title** BTM\_Reduced\_3/20/21

**No. Loci** 10  
**No. Samples** 48  
**No. Pops.** 3  
**Zero Freq. =** 0.01

**Summary of Population Assignment Outcomes to 'Self' or 'Other' Population (With Leave One Out Option)**

| Pop     | Self Pop | Other Pop |
|---------|----------|-----------|
| NWild   | 8        | 1         |
| SWild   | 10       |           |
| Total   | 18       | 1         |
| Percent | 95%      | 5%        |

**Assignment Values (With Leave One Out Option)**

| Sample          | Pop     | NWild   | SWild   | Captive | Assigned Pop |
|-----------------|---------|---------|---------|---------|--------------|
| NWild_Muestra28 | NWild   | -9.318  | -11.320 | 0.000   | 1 NWild      |
| Muestra41_NWild | NWild   | -10.883 | -11.758 | 0.000   | 1 NWild      |
| Muestra49_NWild | NWild   | -15.388 | -8.596  | 0.000   | 2 SWild      |
| Muestra25_NWild | NWild   | -11.268 | -13.293 | 0.000   | 1 NWild      |
| Muestra31_NWild | NWild   | -11.980 | -15.802 | 0.000   | 1 NWild      |
| Muestra36_NWild | NWild   | -9.910  | -13.906 | 0.000   | 1 NWild      |
| Muestra40_NWild | NWild   | -10.856 | -11.133 | 0.000   | 1 NWild      |
| Muestra43_NWild | NWild   | -11.199 | -18.513 | 0.000   | 1 NWild      |
| Muestra46_NWild | NWild   | -7.976  | -9.039  | 0.000   | 1 NWild      |
| SWild_Muestra60 | SWild   | -10.092 | -7.826  | 0.000   | 2 SWild      |
| Muestra63_SWild | SWild   | -15.601 | -12.433 | 0.000   | 2 SWild      |
| Muestra69_SWild | SWild   | -9.321  | -6.816  | 0.000   | 2 SWild      |
| Muestra72_SWild | SWild   | -13.983 | -11.990 | 0.000   | 2 SWild      |
| Muestra74_SWild | SWild   | -11.643 | -10.403 | 0.000   | 2 SWild      |
| Muestra76_SWild | SWild   | -9.560  | -6.816  | 0.000   | 2 SWild      |
| Muestra77_SWild | SWild   | -12.634 | -8.294  | 0.000   | 2 SWild      |
| Muestra19_SWild | SWild   | -10.791 | -10.442 | 0.000   | 2 SWild      |
| Muestra47_SWild | SWild   | -9.494  | -7.836  | 0.000   | 2 SWild      |
| Muestra48_SWild | SWild   | -9.965  | -6.573  | 0.000   | 2 SWild      |
| Capt_821        | Captive | -12.455 | -13.887 | 0.000   | 1 NWild      |
| 457_Capt        | Captive | -11.330 | -11.501 | 0.000   | 1 NWild      |
| 296_Capt        | Captive | -16.342 | -18.835 | 0.000   | 1 NWild      |
| 877_Capt        | Captive | -6.589  | -9.277  | 0.000   | 1 NWild      |
| 38_Capt         | Captive | -15.277 | -12.155 | 0.000   | 2 SWild      |
| 805_Capt        | Captive | -7.249  | -12.154 | 0.000   | 1 NWild      |

Supplemental Information for: Genetic Diversity and Population Structure of Two Endangered Neotropical Parrots Inform *In Situ* and *Ex Situ* Conservation Strategies, Campos et al, 2021 - Diversity

|                      |         |         |         |       |   |       |
|----------------------|---------|---------|---------|-------|---|-------|
| 17_Capt              | Captive | -14.983 | -17.080 | 0.000 | 1 | NWild |
| 63_Capt              | Captive | -10.881 | -12.806 | 0.000 | 1 | NWild |
| 961_Capt             | Captive | -15.048 | -15.534 | 0.000 | 1 | NWild |
| 1079_Capt            | Captive | -15.071 | -14.635 | 0.000 | 2 | SWild |
| 973_Capt             | Captive | -9.559  | -12.547 | 0.000 | 1 | NWild |
| WPP_TX_1606_1.0_Capt | Captive | -10.044 | -11.685 | 0.000 | 1 | NWild |
| 1068_Capt            | Captive | -12.462 | -8.793  | 0.000 | 2 | SWild |
| 1013_Capt            | Captive | -9.152  | -9.164  | 0.000 | 1 | NWild |
| 996_Capt             | Captive | -13.928 | -12.966 | 0.000 | 2 | SWild |
| 983_Capt             | Captive | -14.456 | -10.772 | 0.000 | 2 | SWild |
| 806_Capt             | Captive | -10.342 | -13.237 | 0.000 | 1 | NWild |
| 772_Capt             | Captive | -12.212 | -12.590 | 0.000 | 1 | NWild |
| 812_Capt             | Captive | -10.631 | -10.820 | 0.000 | 1 | NWild |
| 786_Capt             | Captive | -10.685 | -13.346 | 0.000 | 1 | NWild |
| 765_Capt             | Captive | -8.731  | -11.989 | 0.000 | 1 | NWild |
| 871_Capt             | Captive | -10.472 | -12.085 | 0.000 | 1 | NWild |
| 779_Capt             | Captive | -12.537 | -13.110 | 0.000 | 1 | NWild |
| 809_Capt             | Captive | -13.065 | -12.751 | 0.000 | 2 | SWild |
| Muestra53_Capt       | Captive | -8.750  | -11.020 | 0.000 | 1 | NWild |
| Muestra64_Capt       | Captive | -11.868 | -11.360 | 0.000 | 2 | SWild |
| Muestra65_Capt       | Captive | -9.096  | -9.348  | 0.000 | 1 | NWild |
| Muestra66_Capt       | Captive | -11.194 | -12.738 | 0.000 | 1 | NWild |
| Muestra67_Capt       | Captive | -13.881 | -18.303 | 0.000 | 1 | NWild |

Data Sheet TBP\_Partition  
Data Title TBP\_Reduced\_3/20/21

No. Loci 10  
No. Samples 42  
No. Pops. 3  
Zero Freq. = 0.01

Summary of Population Assignment Outcomes to 'Self' or 'Other' Population (With Leave One Out Option)

| Pop     | Self Pop | Other Pop |
|---------|----------|-----------|
| Madera  | 8        | 2         |
| Tutuaca | 3        | 2         |
| Total   | 11       | 4         |
| Percent | 73%      | 27%       |

Assignment Values (With Leave One Out Option)

| Sample          | Pop    | Madera  | Tutuaca | Captive | Assigned Pop |
|-----------------|--------|---------|---------|---------|--------------|
| Wild_291201_Mad | Madera | -7.443  | -11.171 | 0.000   | 1 Madera     |
| 1376_Mad        | Madera | -11.945 | -12.569 | 0.000   | 1 Madera     |
| 003_Mad         | Madera | -12.650 | -12.567 | 0.000   | 2 Tutuaca    |
| 230210_Mad      | Madera | -8.527  | -12.852 | 0.000   | 1 Madera     |



Supplemental Information for: Genetic Diversity and Population Structure of Two Endangered Neotropical Parrots Inform *In Situ* and *Ex Situ* Conservation Strategies, Campos et al, 2021 - Diversity

|                  |         |         |         |       |   |         |
|------------------|---------|---------|---------|-------|---|---------|
| 291502_Mad       | Madera  | -8.992  | -11.655 | 0.000 | 1 | Madera  |
| M0129-1_Mad      | Madera  | -9.865  | -8.745  | 0.000 | 2 | Tutuaca |
| X5-46_Mad        | Madera  | -9.949  | -14.268 | 0.000 | 1 | Madera  |
| 2302-40_Mad      | Madera  | -6.457  | -12.199 | 0.000 | 1 | Madera  |
| 2604_42Mad       | Madera  | -8.826  | -9.819  | 0.000 | 1 | Madera  |
| M1628-1_Mad      | Madera  | -8.375  | -12.958 | 0.000 | 1 | Madera  |
| T0739-2_Tut      | Tutuaca | -10.464 | -10.288 | 0.000 | 2 | Tutuaca |
| T0839-2_Tut      | Tutuaca | -11.937 | -11.275 | 0.000 | 2 | Tutuaca |
| T0939-1_Tut      | Tutuaca | -11.451 | -11.901 | 0.000 | 1 | Madera  |
| T1339-2_Tut      | Tutuaca | -11.771 | -11.372 | 0.000 | 2 | Tutuaca |
| 3711-2_Tut       | Tutuaca | -11.287 | -13.693 | 0.000 | 1 | Madera  |
| Captive_513_Capt | Captive | -8.784  | -8.502  | 0.000 | 2 | Tutuaca |
| 111_Capt         | Captive | -6.788  | -4.692  | 0.000 | 2 | Tutuaca |
| 228_Capt         | Captive | -8.384  | -11.393 | 0.000 | 1 | Madera  |
| 468_Capt         | Captive | -9.798  | -10.296 | 0.000 | 1 | Madera  |
| 592_Capt         | Captive | -9.150  | -10.062 | 0.000 | 1 | Madera  |
| 216_Capt         | Captive | -6.304  | -9.044  | 0.000 | 1 | Madera  |
| 82_Capt          | Captive | -8.739  | -9.247  | 0.000 | 1 | Madera  |
| 421_Capt         | Captive | -10.968 | -12.597 | 0.000 | 1 | Madera  |
| 240_Capt         | Captive | -8.786  | -10.025 | 0.000 | 1 | Madera  |
| 106_Capt         | Captive | -9.397  | -10.472 | 0.000 | 1 | Madera  |
| 200_Capt         | Captive | -9.066  | -10.472 | 0.000 | 1 | Madera  |
| 274_Capt         | Captive | -11.905 | -11.694 | 0.000 | 2 | Tutuaca |
| 527_Capt         | Captive | -7.975  | -13.074 | 0.000 | 1 | Madera  |
| 659_Capt         | Captive | -8.710  | -12.016 | 0.000 | 1 | Madera  |
| 502_Capt         | Captive | -8.871  | -12.859 | 0.000 | 1 | Madera  |
| 527_Capt         | Captive | -8.498  | -12.074 | 0.000 | 1 | Madera  |
| 450_Capt         | Captive | -7.519  | -11.773 | 0.000 | 1 | Madera  |
| 386_Capt         | Captive | -9.004  | -11.521 | 0.000 | 1 | Madera  |
| 544_Capt         | Captive | -9.627  | -10.393 | 0.000 | 1 | Madera  |
| 148_Capt         | Captive | -8.125  | -6.141  | 0.000 | 2 | Tutuaca |
| 149_Capt         | Captive | -8.898  | -11.104 | 0.000 | 1 | Madera  |
| 37_Capt          | Captive | -5.544  | -9.965  | 0.000 | 1 | Madera  |
| 587_Capt         | Captive | -8.847  | -10.560 | 0.000 | 1 | Madera  |
| 227_Capt         | Captive | -11.255 | -7.493  | 0.000 | 2 | Tutuaca |
| 640_Capt         | Captive | -8.022  | -13.074 | 0.000 | 1 | Madera  |
| 503_Capt         | Captive | -11.673 | -15.023 | 0.000 | 1 | Madera  |
| 556_Capt         | Captive | -9.163  | -8.326  | 0.000 | 2 | Tutuaca |

Supplemental Information for: Genetic Diversity and Population Structure of Two Endangered Neotropical Parrots Inform *In Situ* and *Ex Situ* Conservation Strategies, Campos et al, 2021 - Diversity

**Table S8:** Evanno Table output from STRUCTURE Harvester based on 10 iterations of STRUCTURE output and number of clusters (K) ranging from 1 to 10

| <b>Blue-throated macaw</b> |                    |                    |                     |               |                  |                |
|----------------------------|--------------------|--------------------|---------------------|---------------|------------------|----------------|
| <b>K</b>                   | <b>Repetitions</b> | <b>Mean LnP(K)</b> | <b>Stdev LnP(K)</b> | <b>Ln'(K)</b> | <b> Ln''(K) </b> | <b>Delta K</b> |
| 1                          | 10                 | -498.6             | 0.8832              | NA            | NA               | NA             |
| 2                          | 10                 | -500.51            | 4.1786              | -1.91         | 2.18             | 0.521701       |
| 3                          | 10                 | -500.24            | 4.9437              | 0.27          | 1.5              | 0.303415       |
| 4                          | 10                 | -498.47            | 2.0688              | 1.77          | 1.76             | 0.850717       |
| 5                          | 10                 | -498.46            | 0.726               | 0.01          | 0.67             | 0.922834       |
| 6                          | 10                 | -499.12            | 0.7685              | -0.66         | 1.65             | 2.146904       |
| 7                          | 10                 | -498.13            | 1.1748              | 0.99          | 0.93             | 0.791637       |
| 8                          | 10                 | -498.07            | 1.2157              | 0.06          | 1.21             | 0.995324       |
| 9                          | 10                 | -499.22            | 1.9993              | -1.15         | 1.44             | 0.72024        |
| 10                         | 10                 | -498.93            | 2.6758              | 0.29          | NA               | NA             |

  

| <b>Thick-billed parrot</b> |                    |                    |                     |               |                  |                |
|----------------------------|--------------------|--------------------|---------------------|---------------|------------------|----------------|
| <b>K</b>                   | <b>Repetitions</b> | <b>Mean LnP(K)</b> | <b>Stdev LnP(K)</b> | <b>Ln'(K)</b> | <b> Ln''(K) </b> | <b>Delta K</b> |
| 1                          | 10                 | -368.33            | 0.3401              | NA            | NA               | NA             |
| 2                          | 10                 | -368.2             | 1.3115              | 0.13          | 0.3              | 0.228748       |
| 3                          | 10                 | -368.37            | 0.9989              | -0.17         | 0.17             | 0.17018        |
| 4                          | 10                 | -368.71            | 1.511               | -0.34         | 0.71             | 0.469877       |
| 5                          | 10                 | -368.34            | 1.8167              | 0.37          | 0.82             | 0.451365       |
| 6                          | 10                 | -368.79            | 1.5191              | -0.45         | 0.9              | 0.592456       |
| 7                          | 10                 | -368.34            | 1.3343              | 0.45          | 0.14             | 0.104921       |
| 8                          | 10                 | -368.03            | 1.3736              | 0.31          | 0.61             | 0.444088       |
| 9                          | 10                 | -368.33            | 1.0853              | -0.3          | 0.49             | 0.451486       |
| 10                         | 10                 | -368.14            | 1.5123              | 0.19          | NA               | NA             |

Supplemental Information for: Genetic Diversity and Population Structure of Two Endangered Neotropical Parrots Inform *In Situ* and *Ex Situ* Conservation Strategies, Campos et al, 2021 - Diversity

Figure Legend

**Figure S1:** Captive pedigrees for the blue-throated macaw and thick-billed parrot. Pedigree was constructed to one generation above any sampled individuals when possible.

Figure S1

Blue-throated macaw

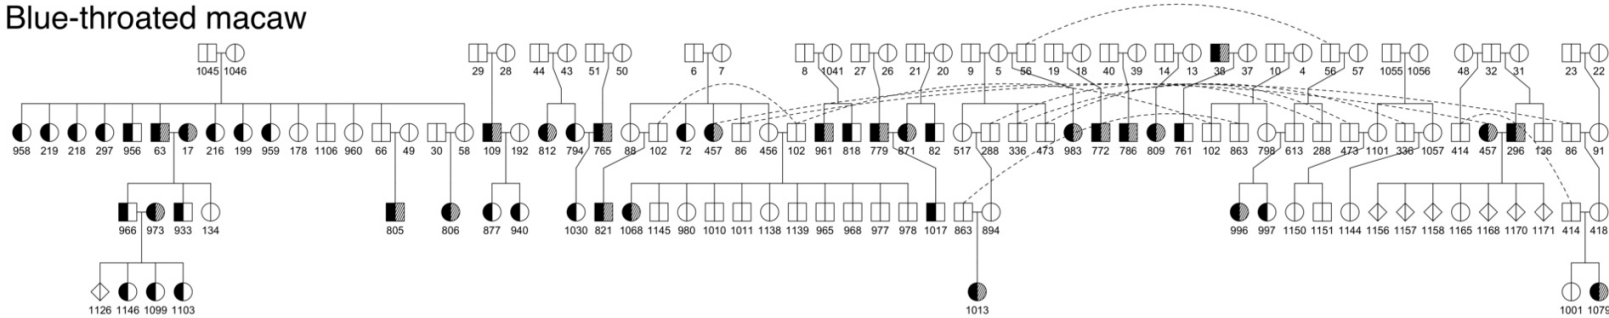

Thick-billed parrot

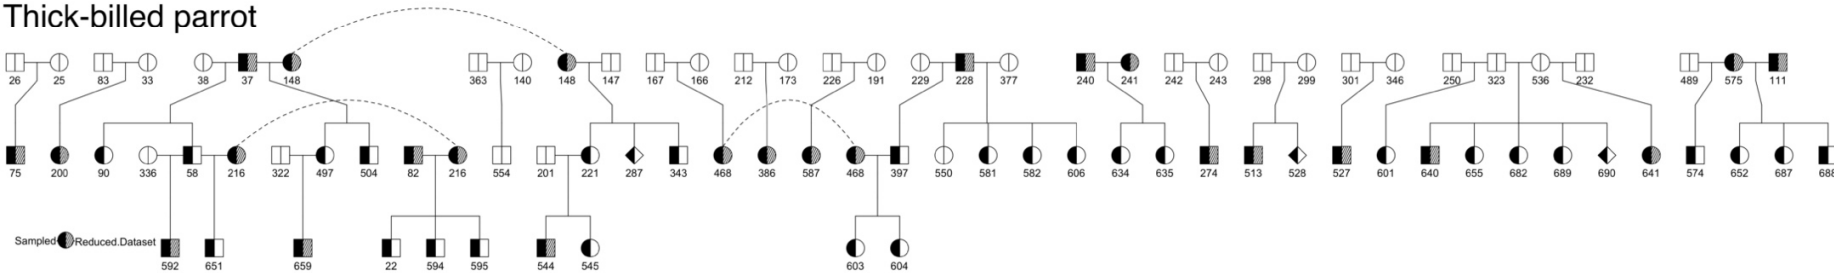

Supplemental Information for: Genetic Diversity and Population Structure of Two Endangered Neotropical Parrots Inform *In Situ* and *Ex Situ* Conservation Strategies, Campos et al, 2021 - Diversity
